# Supplementary material
Source: PubMed Central journal article supplement (PMC3088571)
Supplement: 1017567108_pnas.201017567SI.pdf [file 1017567108_pnas.201017567SI.pdf]

# Supporting Information

Gao et al. 10.1073/pnas.1017567108

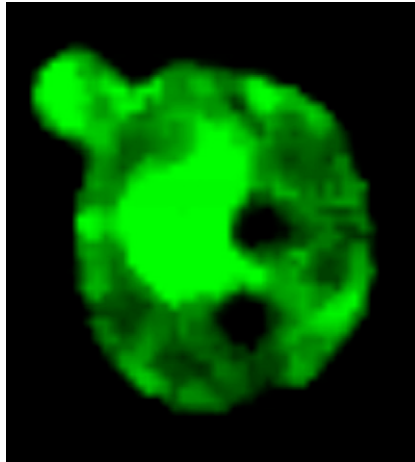

**Movie S1.** iFRAP of GFP-Rho3. The cell was bleached between frames 31 and 32.

[Movie S1](#)

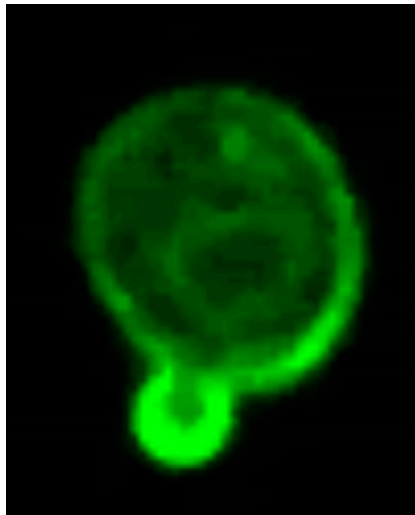

**Movie S2.** iFRAP of GFP-Rho1. The cell was bleached between frames 9 and 10.

[Movie S2](#)

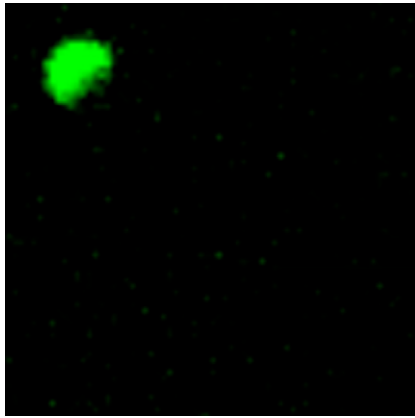

**Movie S3.** iFRAP of Pea2-GFP. The cell was bleached between frames 9 and 10.

[Movie S3](#)

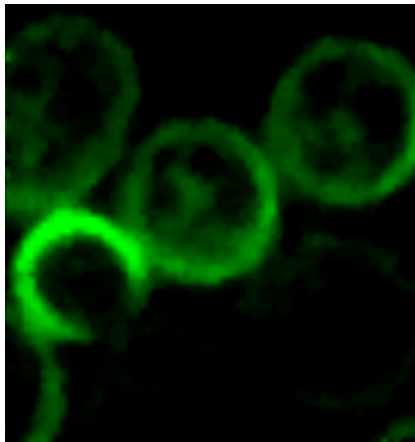

**Movie S4.** Polarization of GFP-Rho1 in a WT cell. Frames were taken every 60 s.

[Movie S4](#)

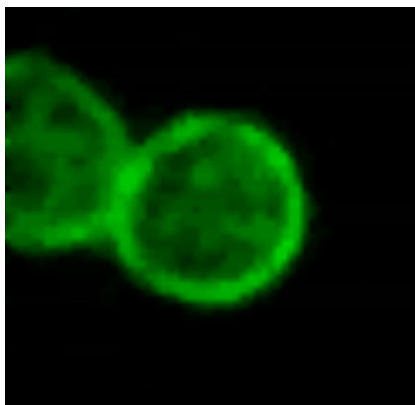

**Movie S5.** Polarization of GFP-Rho1 in a *pea2Δ* mutant cell. Frames were taken every 60 s. Other iFRAP movies of GFP-tagged proteins in WT and mutant cells are available on request.

[Movie S5](#)

## Other Supporting Information Files

[SI Appendix \(PDF\)](#)
