# Supplementary material
Source: PubMed Central journal article supplement (PMC3088571)
Supplement: 1017567108_sapp.pdf [file 1017567108_sapp.pdf]

# **Modular Coherence of Protein Dynamics in Yeast Cell Polarity**

Juntao Tony Gao, Roger Guimerà, Hua Li, Inês Mendes Pinto, Marta Sales-Pardo,

Stephanie C. Wai, Boris Rubinstein\* and Rong Li\*

\* To whom correspondence should be addressed. E-mail: [RLi@stowers.org](mailto:RLi@stowers.org), [bru@stowers.org](mailto:bru@stowers.org)

## **Supporting Online Material includes:**

Supplementary Methods

Figure S1 to S9

Table S1 to S11

Movie S1 to S5

Reference 1 to 8

## Supplementary Methods

### Plasmid construction

The GFP-Rho1 and GFP-Rho3 integrative plasmids used for the iFRAP analysis were constructed using the pRS306 vector as a template cloned with GFP-linker-myc-Rho1 or GFP-linker-myc-Rho3 inserts under the control of the Rho1 promoter. The functionality of the GFP-Rho1 and GFP-Rho3 tagged proteins was assessed in a growth dilution assay after transformation of the pRS316-based Rho1 and Rho3 plasmids in wild type and *rho1Δ* and *rho3Δ* strains with incubation at 23°C or 37°C (Fig. S4). The pRS316 Rho1 and Rho3 plasmids were constructed by cloning the amplified Rho1 and Rho3 inserts from the respective integrative plasmids, including the Rho1 promoter, into the pRS316 vector.

### Yeast Cell wall growth rate analysis

After growing overnight at 23°C, wild type and *pea2Δ* cells were washed with 1xPBS buffer and stained for 10 min with FITC-ConA (5μg/ml, Sigma). Cells were then returned to growth at 23°C for 10 min, 20 min, 30 min and 40 min respectively, washed and fixed with 5% formaldehyde at room temperature for 20min. Thereafter cells were washed and stained with Texas Red-ConA (5μg/ml, Molecular Probes) for 10 min. Cells were washed again using 1 x PBS buffer and imaged using confocal microscopy.

### Identification of robust modules

Given a network, for a certain partition  $P$  of the nodes into modules, the modularity  $M(P)$  is defined as (1):

$$M \equiv \sum_{s=1}^{N_M} \left[ \frac{l_s}{L} - \left( \frac{d_s}{2L} \right)^2 \right]$$

where  $N_M$  is the number of modules,  $L$  is the number of links in the network,  $l_s$  is the number of links between nodes in module  $s$ , and  $d_s$  is the sum of the connectivity (degrees) of the nodes in module  $s$ . Modules (and the optimal number of modules) are typically identified by selecting the partition  $P^*$  that maximizes  $M(P)$ (2). Two issues, however, make direct maximization of the modularity inappropriate for the identification of modules in protein interaction networks. First, protein interaction data reportedly contain numerous false positives and false negatives(3). Second, two different partitions of the same network can have very similar values of modularity, so that by only looking at the partition with the largest modularity some potentially relevant information is lost (4). To overcome these problems and obtain robust modules, we combine modularity maximization with an algorithm that enables one to identify both plausible missing interactions and observed interactions that are likely to be spurious (5).

Specifically, we repeat the following procedure 100 times (Fig. S2 A-D):

(i) From the observed cell polarity protein interaction network (which presumably contains errors and omissions with respect to the unknown *true* protein interaction network), we obtain a “reconstructed network” (2).

(ii) The reconstruction is built by adding plausible missing interactions and removing plausible spurious interactions, using the algorithm described in (4). In general, the reconstructed network has been shown to be closer to the true network than the observed network itself (5).

(iii) We obtain the modules in the reconstructed network by maximizing the modularity.

We obtain 100 reconstructed networks with maximal modularity value. Because of the stochasticity of the reconstruction algorithm, each reconstructed network is slightly different, and so are the modules. With the modules for each of the 100 reconstructed networks, we build a similarity matrix  $S$  whose element  $S_{ij}$  is the fraction of times which proteins  $i$  and  $j$  were placed in the same module (Fig. S2 A-D). From this matrix, we obtain the consensus modules by identifying groups of proteins that are consistently placed in the same module in the reconstructions (5) (Fig. 1A and Fig. S2 A-D).

### **iFRAP experiments, analysis of time-lapse movies and FRET measurements**

In all iFRAP experiments, bleaching was applied on the selected area as indicated in Fig. 2 using the MicroPoint Mosaic system (Photonic Instruments, Inc., Saint Charles, IL). For proteins with  $t_{1/2}$  around or longer than 60s, such as Pea2, Pkc1, and Rho1, longer image recording (4-min videos) was needed: 9 images before iFRAP bleaching, 241 images after iFRAP bleaching with time intervals of 1 s. Pulse frequency was set to 20/s and bleaching was performed for around 2 s. Time-lapse movies (2-min videos) were produced in a standardized manner for most proteins with  $t_{1/2}$  less than 40 s: 31 images before photo bleaching, 241 images after photo bleaching, and time interval between every two images is 0.5 s (thus it takes less than 2.5 min to obtain one time-lapse movie). For Mkk1 which has  $t_{1/2}$  less than 40 s, shorter movies were made on APD confocal microscope (ZEISS): 7 images before, and 80 images after iFRAP bleaching. For each time-lapse movie, background was subtracted and at least one control cell was used for the acquisition of photobleaching correction.

From every iFRAP time-lapse movie, log file created by Metamorph to record cellular fluorescence was uploaded into IDL 7 for background subtraction and curve analysis. Correction

from photobleaching and final curve fitting were performed using OriginPro 8 with custom-made codes. ImageJ 1.4 (<http://rsb.info.nih.gov/ij>) was used occasionally for visualization and quantification. For image photobleaching correction, the background-subtracted fluorescence intensity in the two control cells in every time-lapse iFRAP movie was fitted to the equation

$$Y = A e^{-\omega t}$$

where Y is the average fluorescence in the region of interest, A is the initial fluorescence value, and the factor  $e^{-\omega t}$  was used for correction of fluorescence intensity in the bleached cell. Only curves with the photobleaching rate lower than ~10% were selected for the next step of quantification.

For iFRAP curve fitting, equation

$$Y = A_0 + A' e^{-\omega t}$$

was used, where  $(A_0 + A')$  is the normalized initial fluorescence value and  $A_0$  is the saturation value; and  $t_{1/2} = \ln 2 / \omega$ . For four strains which have low GFP expression level (Gic1, Rom2, Msb4 and Mkk1), every 5 points on iFRAP curve were averaged before iFRAP curve fitting.

For the goodness-of-fit, only the curves with R-square greater than 0.3 were kept for further analysis thus leading to the average R-square value for iFRAP curves in every strain larger than 0.5. For every strain, in order to remove the outliers in  $t_{1/2}$  data set, only the points which are in the range of mean  $\pm 2$  SD were kept.

For the measurement of Rho1 polarization rate in wild-type and *pea2Δ* mutant cells, sigmoid function was used to fit the Rho1 localization curve:

$$y = \frac{A_1 - A_2}{1 + e^{(x-x_0)/k}} + A_2$$

where  $y$  is a ratio of GFP-Rho1 average intensity at the polar cortex to an average intensity in the whole cell;  $A_1$  and  $A_2$  are the initial and final value of the ratio which can be adjusted for fitting;  $1/k$  describes GFP-Rho1 cap formation rate at the inflection point.

The acceptor photobleaching FRET experiments and analysis were performed as described in (6). The FRET efficiency image in Fig. S7 was produced by application of the following procedure using ImageJ 1.4 software:

1. Temporal binning by 4 images (before and after photobleaching) to obtain total fluorescence  $F_b$  and  $F_a$  before and after photobleaching respectively.
2. The background was subtracted and images were spatially binned by 8 pixels.
3. For each pixel the FRET efficiency ratio  $F_a / F_b$  was calculated and the result was presented in a color heat map.

The normalized FRET efficiency ratio presented in Fig. S7 was calculated by dividing all FRET efficiency ratios of each protein interacting pair by the mean of their respective negative control, therefore setting the mean of the negative control equal to 1.

### **Modeling polarity protein dynamics**

Consider a protein interaction network made of  $n$  functional modules. Each module is assigned the characteristic time  $\tau_i$ ,  $i = 1, 2, \dots, n$ . A protein  $p$  is characterized by the integer vector  $\mathbf{N}_p = \{N_{p,1}, N_{p,2}, \dots, N_{p,n}\}$  where  $N_{p,i}$  is the number of interactions of this protein with proteins from the  $i$ -th module and is determined by the network modular structure. The lifetime  $T_{p,i}$  of the bond created by the protein  $p$  and the protein from the  $i$ -th module is defined as the characteristic time of the  $i$ -th module, i.e.,  $T_{p,i} = \tau_i$ . We estimate  $\tau$ 's using multivariate regression as:

$$\tau_{p,j} = \sum_{i=1}^n \frac{N_{p,i}}{N_p} \tau_i + e_{p,j}$$

where  $\tau_{p,j}$  represents the residence time for the  $j$ -th measurement of the  $p^{\text{th}}$  protein (experimentally obtained);  $\tau_i$  represents the residence time for the  $i^{\text{th}}$  module;  $N_{p,i} / N_p$  represents the percentage of connections to the  $i^{\text{th}}$  module for the  $p^{\text{th}}$  protein;  $N_p = \sum_{i=1}^n N_{p,i}$  is the total module connection for the  $p^{\text{th}}$  protein;  $e_{p,j}$  is the error term.

The regression analysis was performed using SAS 9.2. We first used the data from the 29 proteins to see how well the model (Eq.2) fits the data. Then, we use a set of 10 proteins (either a chosen set or randomly drawn sets from 29 proteins without replacement, see Results), each protein having at least 10 measurements to estimate the residence time for five modules. The square root of the error mean square was recorded. This Eq.2 model was used to predict the mean residence time for those proteins not included in the training set. Pearson correlation coefficients and p-value between the predicted values and the observed mean values were calculated.

## **Protein dynamics and the Kuramoto model**

In adapting concepts of the Kuramoto model to explain the dynamical properties of proteins in cell polarity, we consider each protein in the PCD network as a unit oscillator (oscillating between cytoplasmic and polar cortical locations) interacting with the five modular oscillators corresponding to the five sub-functions intrinsically harbored in the PCD network. Each modular oscillator is akin to a Kuramoto's "giant oscillator", however, the original theory only deals with unimodal distribution of oscillator frequencies. Pre-defining modular oscillators based on network modularity precludes the bottom up approach used in the original theory to describe the spontaneous emergence of giant oscillators as a result of oscillator coupling, but with this assumption we aimed to explore the mathematical relationship between the dynamics of

unit oscillators with the modular oscillators once the system has evolved to a steady-state, where the behavior of the “giant oscillators” is stably established (see below).

The original Kuramoto model (7) describes the phase dynamics of  $N \gg 1$  identical oscillators governed by the equations  $d\phi_i/dt = \omega_i + \varepsilon/N \sum_{j=1} \sin(\phi_j - \phi_i)$ , where  $\varepsilon$  is the strength of interaction,  $\phi_i(t)$  is the phase and  $\omega_i$  is the natural frequency of  $i$ -th oscillator. The distribution of frequencies  $g(\omega)$  is assumed to be unimodal centered around  $\omega = \omega_0$ . When the interaction strength  $\varepsilon$  reaches a critical value  $2/(\pi g(\omega_0))$ , this system of oscillators self-organizes into the “giant oscillator” characterized by a single frequency to which all unit oscillators are locked. In reference (8) it was shown that for bimodal frequency distribution, one observes emergence of two “giant oscillators” with different frequencies.

Viewing the modular structure of the PCD network as a set of five “giant oscillators”, one can ask: how is the dynamics of a single unit oscillator governed by the network structure. We assume that the dynamical properties of the “giant oscillators” are not affected by their interaction with unit oscillators.

Then the phase  $\phi(t)$  of the unit oscillator with a natural frequency  $\omega$  is governed by the equation  $d\phi/dt = \omega + \varepsilon \sum_{i=1} w_i \sin(\omega_i t - \phi)$ , where  $\omega_i$  is the  $i$ -th “giant oscillator” frequency and  $w_i$  is the weight of  $i$ -th module proportional to the number of interactions of the unit oscillator with this module ( $\sum_{i=1} w_i = 1$ ). The numerical simulations of this model show that independently of the natural frequency  $\omega$  value of the unit oscillator, the oscillator frequency is locked to a constant value determined by the frequencies and weights of the network modules.

One can further simplify the model by replacing the nonlinear phase interaction with a linear one, so that the governing equation reads  $d\phi/dt = \omega + \varepsilon \sum_{i=1} w_i (\omega_i t - \phi)$ . This equation admits



a stable steady state solution corresponding to the observed oscillator frequency equal to the weighted mean of the “giant oscillator” frequencies  $\sum_{i=1} w_i \omega_i$ . As we represent and measure the dynamics of proteins in the PCD by their residence times, it would be reasonable to consider a model that postulates the observed residence time  $\tau_p$  of protein p (analogous to of the observed frequency of a unit oscillator) as weighted mean of the modules characteristic kinetic parameter  $\tau_i$  (analogous to giant oscillator frequency  $\omega_i$ ) as follows  $\tau_p = \sum_{i=1} w_i \tau_i$ . The last transformation from the frequency to residence time dynamical description is not justified mathematically, but the analysis performed shows that the residence time approach describes the experimental measurements much better than the frequency-based one.

### **Modularity Test**

To address the issue of the unimodular network structure our model predicts a single residence time  $t$  for all network components computed as simple or weighted mean of measured  $t_{1/2}$ . To compute the correlation between the predicted and observed values we used *Mathematica* 7.0.1 to generate 10000 sets of 29 random numbers with the average equal to  $t$  and standard deviation equal to that of the measured  $t_{1/2}$ . The correlation of each set with the observed values was computed and the results were averaged showing that no correlation exists, the average correlation value is 0 with the standard deviation equal to 0.07. No correlation was found greater by absolute value than 0.24.

### **Statistics**

For the analysis comparing average  $t_{1/2}$  values for two modules (Signaling and Transport), we fitted a model including module effect and protein effect such that the protein

effect was considered as nested within the module. We also fitted a model without considering the module effect to compare the difference between all proteins. Tukey method was used for pair-wise comparison. For the analysis comparing cell wall growth between wild-type and mutant cells, we fitted a two way ANOVA model including time, genotype (wild-type and mutant), and their interaction effect. For the analysis comparing the average  $t_{1/2}$  values between a protein itself to its directly interacting proteins or to its indirectly interacting proteins (Table S8), we fitted a one way ANOVA model.

## Supplementary Figure Legends

**Fig. S1.** A network of polarity protein interactions. Polarity protein network contained 99 nodes and 302 linkages obtained from BioGrid database (version 2.0.51), visualized in Cytoscape version 2.6.3.

**Fig. S2.** Identification of robust modules. From the observed protein interaction network (**A**), we build 100 reconstructions following Ref. (2) (**B**). For each of the reconstructed networks, we identify modules by maximizing modularity (4); therefore, we obtain 100 partitions of the nodes into modules (**C**). From the 100 partitions, we build a similarity matrix  $S$  whose element  $S_{ij}$  is the fraction of times which proteins  $i$  and  $j$  are in the same module (**D**). From this matrix, we obtain the consensus modules using the box identification procedure described in Ref.(5).

**Fig. S3.** A protein-protein similarity matrix based on the polarity protein interaction network was constructed and ordered using the network analysis scheme discussed in the text and Figure S2. Modules can be observed as distinct groups of nodes (outlined by black lines).

**Fig. S4.** Functional analysis of GFP-tagged Rho1 and Rho3 at different temperatures (23°C and 37°C). GFP-Rho1 and GFP-Rho3 plasmids were transformed into wild type, and the respective deletion mutant and growth analysis were performed using a 5 fold dilution drop test.

**Fig. S5.** A lack of correlation between  $t_{1/2}$  and node properties. Scatter plots are shown of  $t_{1/2}$  versus (A) Degree, (B) Betweenness, and (C) Participation coefficient for each protein. Additional correlation analysis results can be found in Table S7.

**Fig. S6.** The dynamics of two proteins in the Mitotic Exit module assessed by iFRAP. Statistical representation is the same as described in Figure 2D legend.

**Fig. S7.** FRET efficiency analysis of Pea2 and Rho1 interaction. (A) Pixel average FRET efficiency analysis of Pea2 and Rho1 interaction in cells expressing Pea2-mCherry and GFP-Rho1. The FRET efficiency (FE) is defined as the fluorescence intensity after photobleaching divided by the intensity before photobleaching. Scale bars: 1  $\mu$ m. (B) Analysis of FE at the bud cortex in cells expressing Pea2-mCherry and GFP-Rho1 compared with cells expressing Pea2-GFP and Spa2-mcherry (as positive control for FRET). Cells expressing Spa2-GFP or GFP-Rho1 alone were used as negative control for FRET. FE values were normalized to the respective negative control average FE.

**Fig. S8.** Effects of *pea2 $\Delta$*  on the dynamics of 11 polarity proteins (Spa2, Bud6, Rho1, Myo2, Rho3, Lrg1, Rga1, Cdc42, Bni1, Pkc1 and Yor304c-a). The dynamics were measured as iFRAP  $t_{1/2}$  and represented as in the legend of Figure 2D and E (p-value was obtained using t-test, equal variance assumed).

**Fig. S9.** Polarization of Rho1 in wild-type and *pea2 $\Delta$*  cells. Three representative curves obtained from time-lapse imaging of cells of each genotype showing that GFP-Rho1 polarization occurred

at a significantly lower speed in wild-type cells (**A**) than in *pea2Δ* mutants (**B**). Images of a polarized wild-type (**A**) and *pea2Δ* (**B**) cell with GFP-Rho1 and kymographs of representative movies are shown next to the graphs.

## Supplementary Table Legends

**Table S1.** List of 111 polarity proteins involved in polarity establishment and maintenance.

**Table S2.** 99 proteins were assigned into 5 different modules by the stochastic search algorithm mentioned in the text.

**Table S3.** Participation coefficient and z score to determine the role for every protein in the polarity protein network. The Participation coefficient of a node is close to 1 if its links are uniformly distributed among all modules and 0 if all of its links are within its own module. The within-module degree z-score measures how ‘well connected’ node  $i$  is to other nodes in the module. Z-score of 0 indicates that the number of links  $\kappa_i$  of node  $i$  to other nodes in its module  $s_i$ , is equal to the average of  $\kappa$  over all the nodes in module  $s_i$ .

**Table S4.** iFRAP  $t_{1/2}$  values for the 11 GFP tagged proteins in the Signaling module.

**Table S5.** iFRAP  $t_{1/2}$  values for the 18 GFP tagged proteins in the Transport module.

**Table S6.** There is no clear separation of  $t_{1/2}$  values for components of Signaling and Transport modules. Pairwise comparison with Tukey multiple comparison procedure followed by one-way ANOVA was performed to test if there is significant difference in any pairwise comparisons for 29 proteins from the two modules. The proteins with the same letter show non-significant difference from each other (similar to the line plot).

Except for Pea2 and Rho1 that have large  $t_{1/2}$  s, five proteins labeled with letter C (Rga1 from Signaling module, the other four from transport module) have no significant difference from each other. The majority of proteins labeled with letter D belong to either Transport or Signaling module, indicating that proteins from the same module do not always have similar  $t_{1/2}$  s.

**Table S7.** Six commonly used parameters describing network properties and analysis of their correlation with  $t_{1/2}$  values.

The six global network parameters are defined as below:

***Degree:*** In graph theory, the degree  $k_i$  of node (vertex)  $i$  is the number of edges incident to the vertex, with loops counted twice. The degree is a measure of centrality since it provides a rough indication of the importance of a node based on how well it "connects".

***Clustering coefficient:*** For node  $i$ , clustering coefficient is the number of pairs of neighbors of  $i$  that are connected divided by the total number of possible pairs of neighbors  $k_i(k_i - 1) / 2$ . A clustering coefficient that is higher than that of other nodes indicates greater "cliquishness". For the whole network, one can compute the average clustering coefficient and compare it to the average coefficient expected for the equivalent random network with the same number of nodes and the same degree distribution. For the network we study, the average clustering coefficient is 0.20, which is much bigger than the one in random network.

***Eccentricity:*** For node  $i$ , eccentricity is the largest distance between node  $i$  and any other node in the graph (provided the other node is in the same connected component). The eccentricity provides another measure of centrality since the node with the smallest eccentricity can be considered as the "closest" one to any other node in the graph.

**Betweenness:** For a given node, betweenness is the number of shortest paths between two nodes in a graph that go through that vertex. The betweenness is also a measure of how central a node is since the higher the betweenness of a node is, the more information flows through this node.

Once nodes are grouped into modules, each node has some connections within its own module (within module degree) and some connections to other modules. In our analysis, we use two measurements of such property:

**Participation coefficient:** For node  $i$  in module  $m$ , participation coefficient measures the distribution of connections among the other modules. Nodes with all the connections within their own module have a participation coefficient equal to zero whereas nodes with more connections to several other modules than to its own module have a participation coefficient that is closer to 1.

**Within module degree z-score:** For node  $i$  in module  $m$ , within module degree z-score measures how different the number of connections to other nodes in the same modules with respect to the distribution of within module degrees for all of the nodes in the module.

**Table S8.** For most of the 29 proteins that have more than one interaction partners within the PCD network, there is no predictable trend whether their dynamics are more similar to their directly interacting partners vs indirectly-interacting proteins. In this table:

**Direct\_mean** (column B): For a given protein, **direct\_mean** refers to the mean of  $t_{1/2}$  values of all its direct interaction partners among the 29 proteins.

**Indirect\_mean** (column C): For a given protein, **indirect\_mean** refers to the mean of  $t_{1/2}$  values of its indirect interaction partners among the 29 proteins.



**Self\_mean** (column D): For a given protein, **self\_mean** is the mean of  $t_{1/2}$  values of this protein.

**Direct p value** (column E): measures the difference between **direct\_mean** (column B) and **self\_mean** (column D), that is, the difference between the mean of  $t_{1/2}$  values of a given protein and the mean of  $t_{1/2}$  values of this given protein's direct interaction partners. Colors indicate that there is significant difference (p value < 0.05).

**Indirect p value** (column F): measures the difference between **indirect\_mean** (column C) and **self\_mean** (column D), that is, the difference between the mean of  $t_{1/2}$  values of the given protein and the mean of  $t_{1/2}$  values of this given protein's indirect interaction partners. Colors indicate that there is significant difference (p value < 0.05).

**Table S9.** iFRAP  $t_{1/2}$  values for the two GFP-tagged proteins (Kel1 and Lte1) in the Mitotic Exit module.

**Table S10.** iFRAP  $t_{1/2}$  values for the effects of *pea2Δ* on the dynamics of 11 polarity proteins (Spa2, Bud6, Rho1, Myo2, Rho3, Lrg1, Rga1, Cdc42, Bni1, Pkc1 and Yor304c-a).

**Table S11.** Yeast strains used in this study.

## Supplementary Movie Legends

Movie S1. iFRAP of GFP-Rho3. Frames were taken every 0.5 s. The cell was bleached between frame 31 and 32.

Movie S2. iFRAP of GFP-Rho1. Frames were taken every 1 s. The cell was bleached between frame 9 and 10.

Movie S3. iFRAP of Pea2-GFP. Frames were taken every 1 s. The cell was bleached between frame 9 and 10.

Movie S4. Polarization of GFP-Rho1 in a wild-type cell. Frames were taken every 60 s.

Movie S5. Polarization of GFP-Rho1 in a *pea2Δ* mutant cell. Frames were taken every 60 s.

Other iFRAP movies of GFP-tagged proteins in wild type and in mutant cells are available upon request.

## Reference

1. Newman MEJ & Girvan M (2004) Finding and evaluating community structure in networks. *Phys. Rev. E* 69:no. 026113.
2. Guimerà R & Sales-Pardo M (2009) Missing and spurious interactions and the reconstruction of complex networks. (Translated from eng) *Proc. Natl Acad. Sci. USA* 106(52):22073-22078 (in eng).
3. von Mering C, *et al.* (2002) Comparative assessment of large-scale data sets of protein-protein interactions. *Nature* 417(6887):399-403.
4. Guimerà R & Amaral LAN (2005) Functional cartography of complex metabolic networks. (Translated from eng) *Nature* 433(7028):895-900 (in eng).
5. Sales-Pardo M, Guimerà R, Moreira AA, & Amaral LA (2007) Extracting the hierarchical organization of complex systems. (Translated from eng) *Proc. Natl Acad. Sci. USA* 104(39):15224-15229 (in eng).
6. Slaughter BD, Schwartz JW, & Li R (2007) Mapping dynamic protein interactions in MAP kinase signaling using live-cell fluorescence fluctuation spectroscopy and imaging. *Proc. Natl Acad. Sci. USA* 104(51):20320-20325.
7. Kuramoto Y (1984) *Chemical Oscillations, Waves, and Turbulence* (Dover Publications).
8. Strogatz SH (2000) From Kuramoto to Crawford: Exploring the onset of synchronization in populations of coupled oscillators. *Physica D* 143:1-20.

Supplementary Figure 1

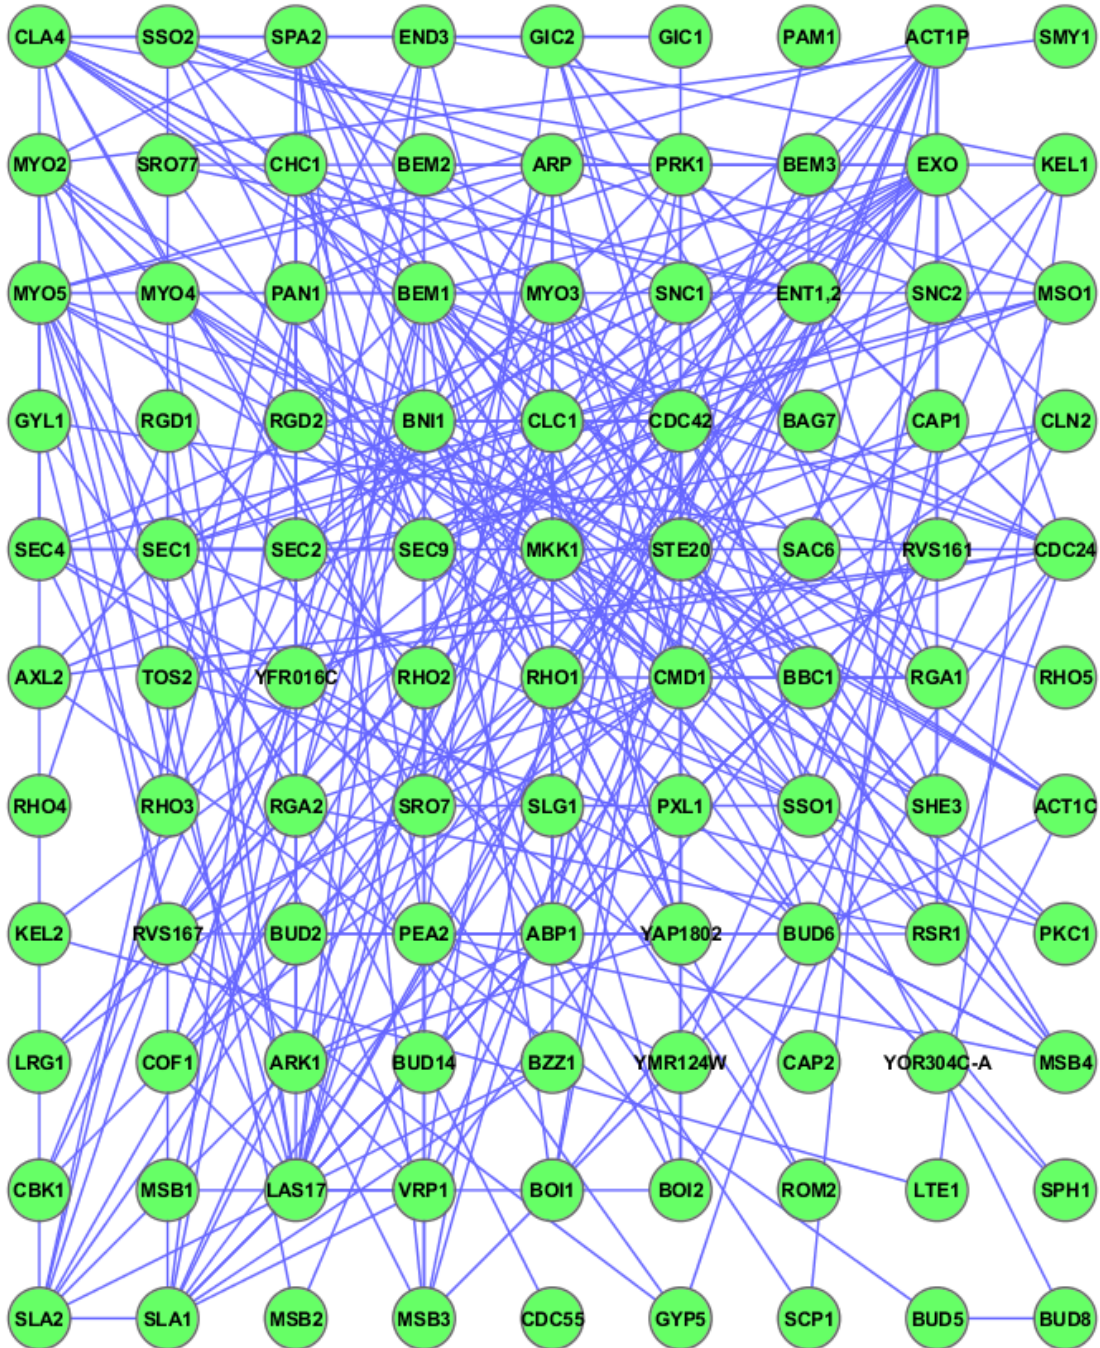

Supplementary Figure 2

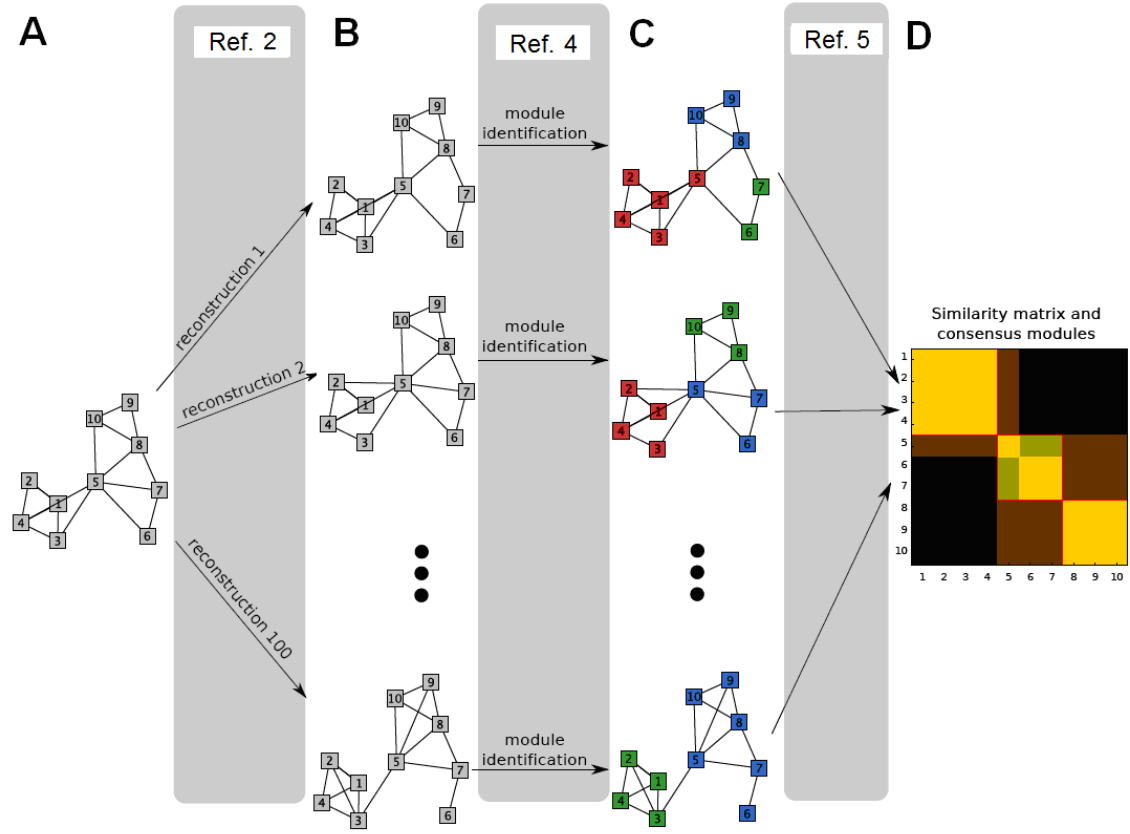



Supplementary Figure 4

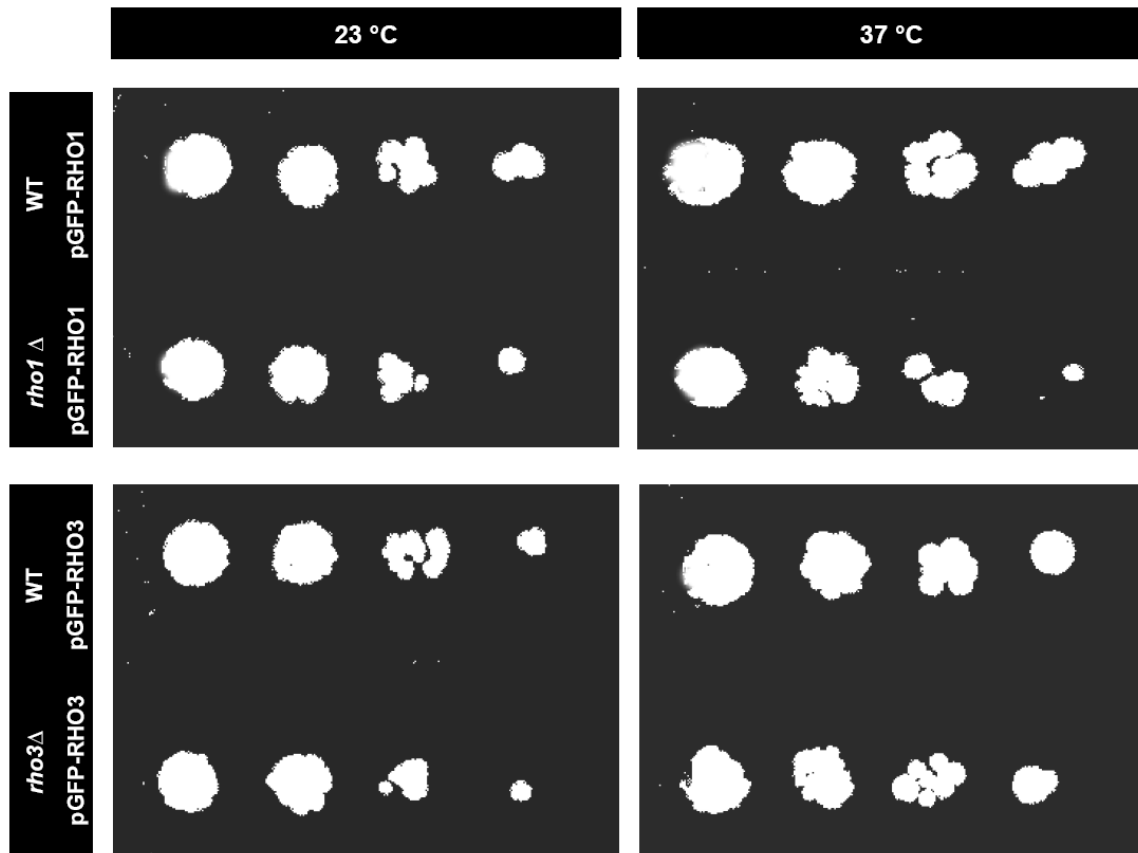

### Supplementary Figure 5

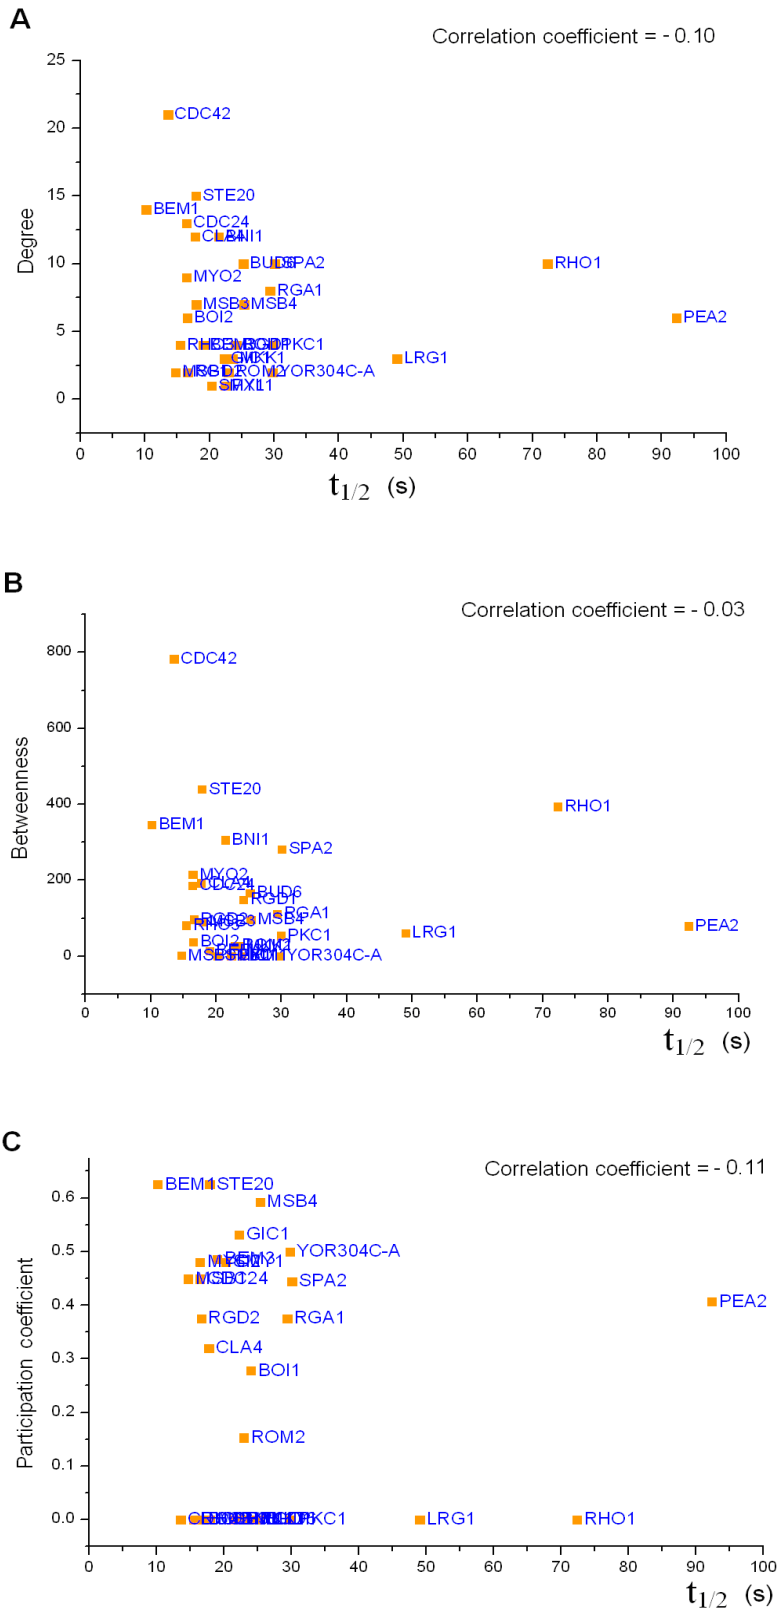



Supplementary Figure 6

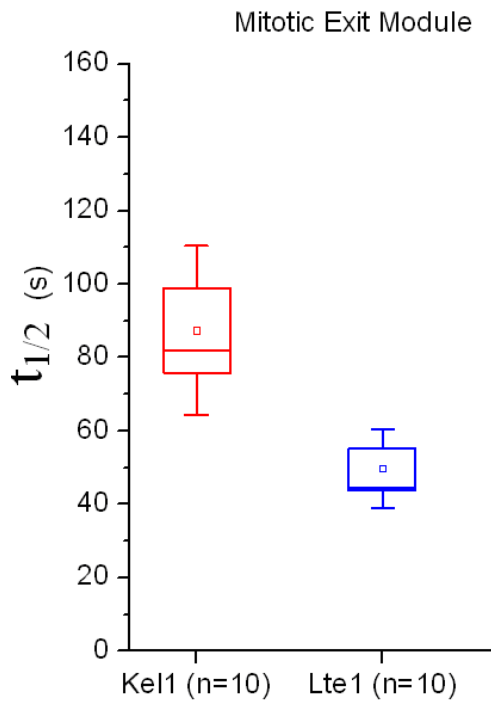

Supplementary Figure 7

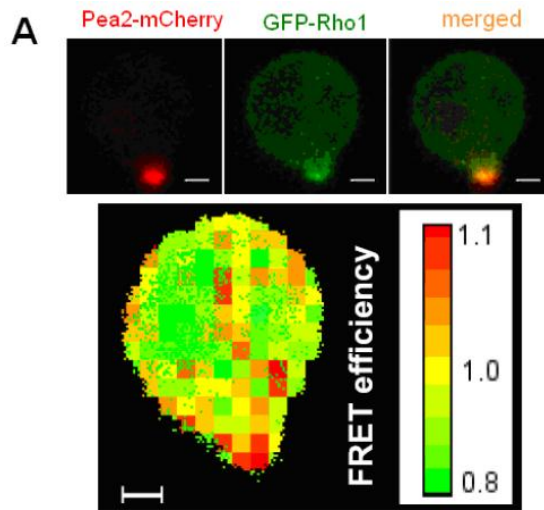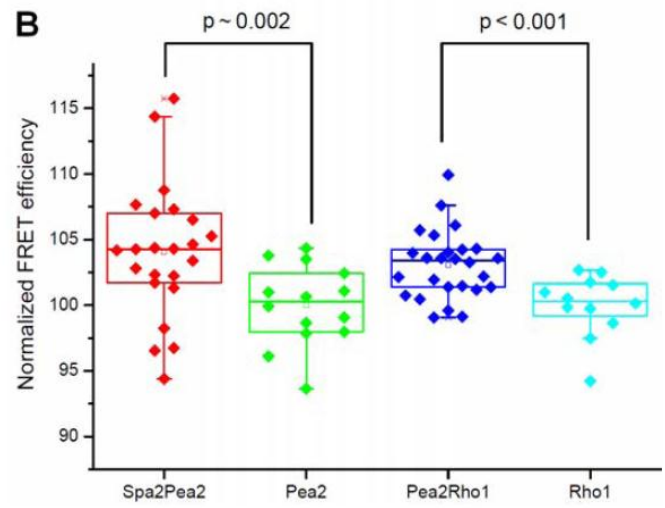

Supplementary Figure 8

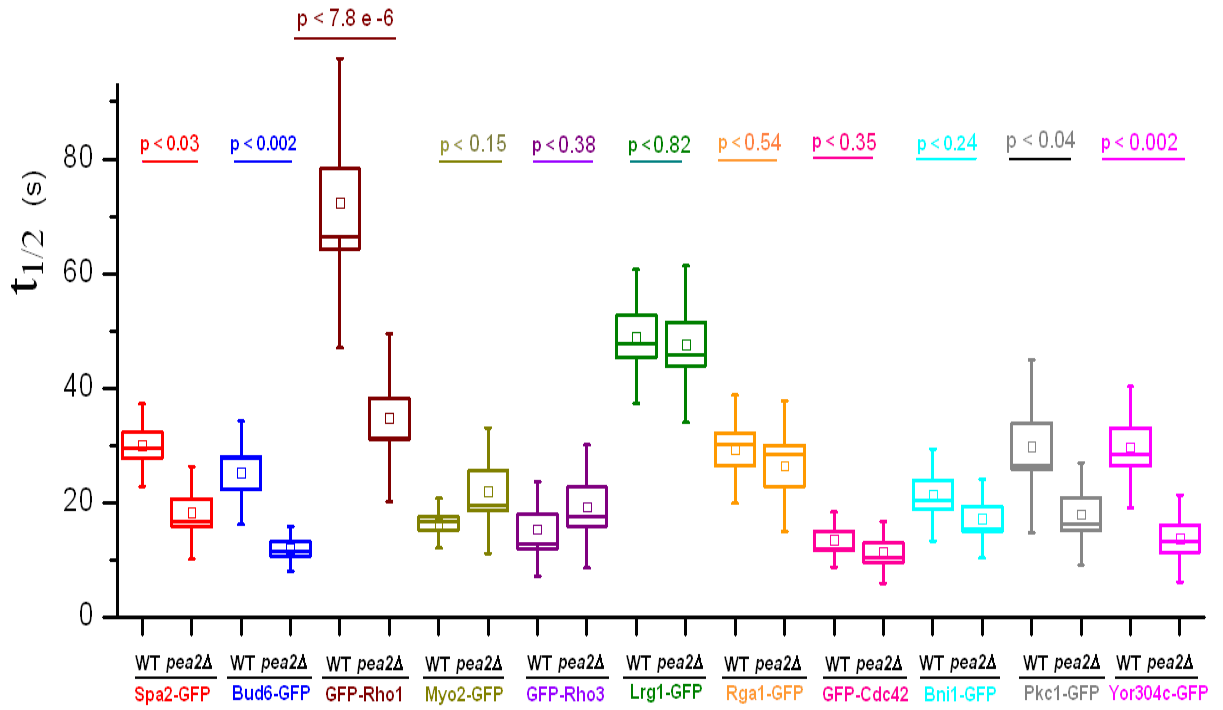

Supplementary Figure 9

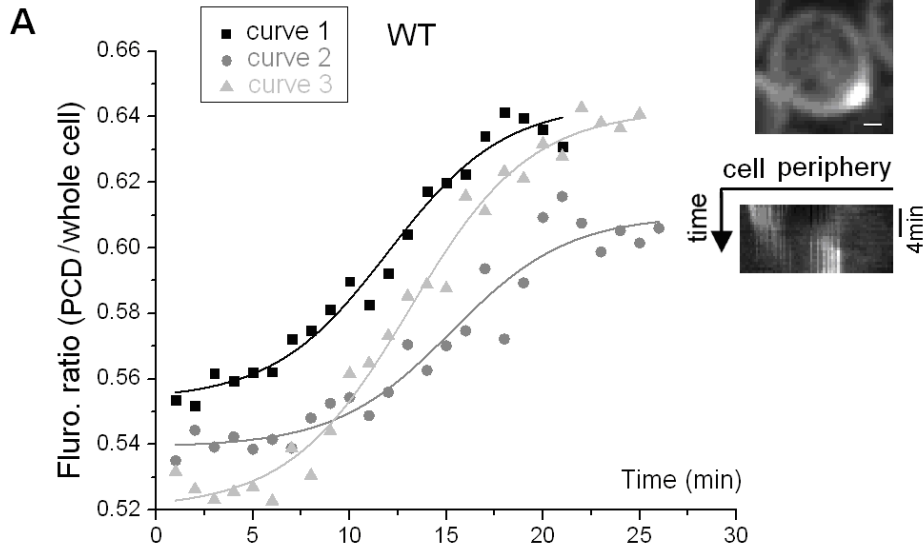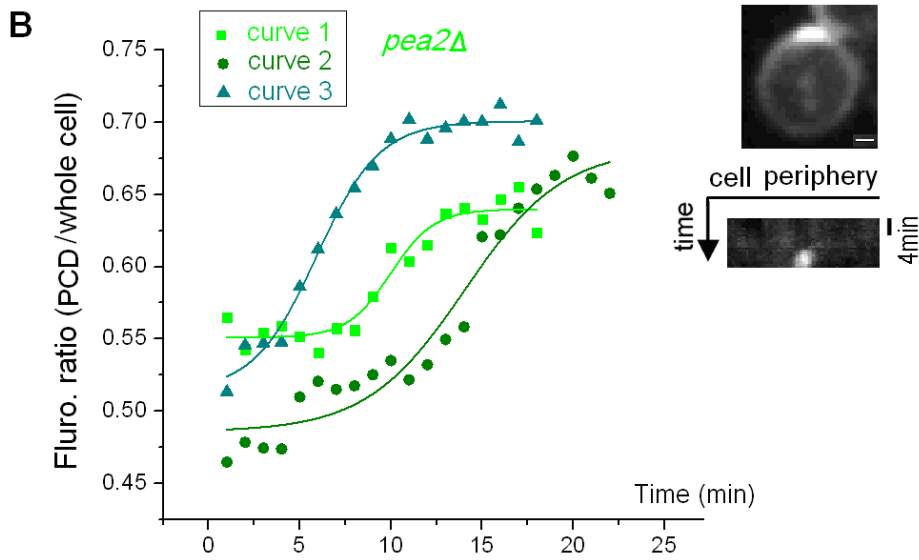



**Table S2. Five modules in budding yeast polarity protein interaction network**

| Module name             | Mitotic Exit | Endocytosis | Transport | Signaling | Exocytosis |
|-------------------------|--------------|-------------|-----------|-----------|------------|
| Node number in a module | 6            | 33          | 25        | 22        | 13         |
| Bem2                    | Abp1         | Act1C       | Axl2      | Cbk1      |            |
| Bud14                   | Act1P        | Bag7        | Bem1      | Exo       |            |
| Kel1                    | Ark1         | Bni1        | Bem3      | Mso1      |            |
| Kel2                    | Arp          | Bud6        | Boi1      | Sec1      |            |
| Lte1                    | Bbc1         | Lrg1        | Boi2      | Sec2      |            |
| Ymr124w                 | Bzz1         | Mkk1        | Bud2      | Sec4      |            |
|                         | Cap1         | Msb1        | Bud5      | Sec9      |            |
|                         | Cap2         | Msb3        | Bud8      | Snc1      |            |
|                         | Cdc55        | Msb4        | Cdc24     | Snc2      |            |
|                         | Chc1         | Myo2        | Cdc42     | Sro7      |            |
|                         | Clc1         | Pea2        | Cla4      | Sro77     |            |
|                         | Cmd1         | Pkc1        | Cln2      | Sso1      |            |
|                         | Cof1         | Pxl1        | Gic1      | Sso2      |            |
|                         | End3         | Rgd1        | Gic2      |           |            |
|                         | Ent1,2       | Rho1        | Msb2      |           |            |
|                         | Gyl1         | Rho2        | Pam1      |           |            |
|                         | Gyp5         | Rho3        | Rga1      |           |            |
|                         | Las17        | Rho4        | Rga2      |           |            |
|                         | Myo3         | Rom2        | Rgd2      |           |            |
|                         | Myo4         | Slg1        | Rho5      |           |            |
|                         | Myo5         | Smy1        | Rsr1      |           |            |
|                         | Pan1         | Spa2        | Ste20     |           |            |
|                         | Prk1         | Sph1        |           |           |            |
|                         | Rvs161       | Tos2        |           |           |            |
|                         | Rvs167       | Yor304c-a   |           |           |            |
|                         | Sac6         |             |           |           |            |
|                         | Scp1         |             |           |           |            |
|                         | She3         |             |           |           |            |
|                         | Sla1         |             |           |           |            |
|                         | Sla2         |             |           |           |            |
|                         | Vrp1         |             |           |           |            |
|                         | Yap1802      |             |           |           |            |
|                         | Yfr016c      |             |           |           |            |

Table S3. Participation coefficient and z-score for 99 proteins

|           | Participation coefficient | z-score |
|-----------|---------------------------|---------|
| ABP1      | 0.17                      | 1.06    |
| ACT1C     | 0.34                      | 1.63    |
| ACT1P     | 0.50                      | 0.3     |
| ARK1      | 0.28                      | -0.36   |
| ARP       | 0.37                      | 0.2     |
| AXL2      | 0.00                      | -0.28   |
| BAG7      | 0.00                      | -0.98   |
| BBC1      | 0.32                      | -0.64   |
| BEM1      | 0.54                      | 1.19    |
| BEM2      | 0.63                      | -0.26   |
| BEM3      | 0.00                      | -0.28   |
| BN1       | 0.49                      | 2.03    |
| BO1       | 0.00                      | -0.28   |
| BO2       | 0.28                      | 0.01    |
| BUD14     | 0.00                      | -0.26   |
| BUD2      | 0.00                      | -0.87   |
| BUD5      | 0.00                      | -0.87   |
| BUD6      | 0.18                      | 2.46    |
| BUD8      | 0.00                      | -0.87   |
| BZZ1      | 0.00                      | -0.64   |
| CAP1      | 0.64                      | 0       |
| CAP2      | 0.00                      | 0       |
| CBK1      | 0.67                      | -1.98   |
| CDC24     | 0.27                      | 1.78    |
| CDC42     | 0.45                      | 2.95    |
| CDC55     | 0.00                      | -1.5    |
| CHC1      | 0.28                      | -0.36   |
| CLA4      | 0.38                      | 1.19    |
| CLC1      | 0.32                      | -0.64   |
| CLN2      | 0.32                      | -0.28   |
| CMD1      | 0.48                      | 0.2     |
| COF1      | 0.56                      | -0.93   |
| END3      | 0.32                      | -0.64   |
| ENT1,2    | 0.58                      | -0.28   |
| EXO       | 0.70                      | 0.55    |
| GIC1      | 0.00                      | -0.57   |
| GIC2      | 0.53                      | 0.01    |
| GYL1      | 0.00                      | -0.93   |
| GYP5      | 0.00                      | -0.93   |
| KEL1      | 0.28                      | 2.13    |
| KEL2      | 0.00                      | -0.26   |
| LAS17     | 0.28                      | 2.77    |
| LRG1      | 0.44                      | -0.55   |
| LTE1      | 0.00                      | -0.26   |
| MKK1      | 0.00                      | -0.12   |
| MSB1      | 0.50                      | -0.98   |
| MSB2      | 0.00                      | -0.87   |
| MSB3      | 0.45                      | 0.74    |
| MSB4      | 0.57                      | 0.3     |
| MSO1      | 0.00                      | 0.97    |
| MYO2      | 0.59                      | 0.74    |
| MYO3      | 0.40                      | 0.77    |
| MYO4      | 0.48                      | -0.93   |
| MYO5      | 0.15                      | 1.34    |
| PAM1      | 0.00                      | -1.16   |
| PAN1      | 0.31                      | 0.77    |
| PEA2      | 0.50                      | 0.3     |
| PKC1      | 0.38                      | -0.12   |
| PRK1      | 0.41                      | -0.07   |
| PXL1      | 0.00                      | -0.98   |
| RGA1      | 0.41                      | 0.3     |
| RGA2      | 0.00                      | 0.01    |
| RGD1      | 0.38                      | -0.12   |
| RGD2      | 0.00                      | -0.87   |
| RHO1      | 0.46                      | 1.6     |
| RHO2      | 0.00                      | -0.55   |
| RHO3      | 0.38                      | -0.12   |
| RHO4      | 0.00                      | -0.98   |
| RHO5      | 0.00                      | -1.16   |
| ROM2      | 0.00                      | -0.55   |
| RSR1      | 0.24                      | 0.3     |
| RVS161    | 0.00                      | -0.07   |
| RVS167    | 0.15                      | 1.34    |
| SAC6      | 0.00                      | -1.22   |
| SCP1      | 0.00                      | -1.22   |
| SEC1      | 0.00                      | 0.97    |
| SEC2      | 0.63                      | -0.71   |
| SEC4      | 0.47                      | -0.29   |
| SEC9      | 0.00                      | 1.82    |
| SHE3      | 0.32                      | -0.64   |
| SLA1      | 0.17                      | 1.06    |
| SLA2      | 0.20                      | 0.49    |
| SLG1      | 0.50                      | -0.98   |
| SMY1      | 0.00                      | -0.98   |
| SNC1      | 0.00                      | 0.13    |
| SNC2      | 0.00                      | -0.29   |
| SPA2      | 0.48                      | 1.6     |
| SPH1      | 0.00                      | -0.55   |
| SRO7      | 0.45                      | -0.29   |
| SRO77     | 0.44                      | -1.56   |
| SSO1      | 0.00                      | 0.55    |
| SSO2      | 0.00                      | 0.13    |
| STE20     | 0.62                      | 0.89    |
| TOS2      | 0.50                      | -0.98   |
| VRP1      | 0.00                      | 0.2     |
| YAP1802   | 0.00                      | -0.07   |
| YFR016C   | 0.63                      | 0       |
| YMR124W   | 0.50                      | -1.06   |
| YOR304C-A | 0.00                      | -0.55   |

**Table S4 .  $t_{1/2}$  values for proteins in Signaling module**  
 (equation  $Y = A_0 + A * \exp(-\omega * t)$  was used for iFRAP curve fitting,  
 for details see supplementary online material. )

|          | Bem1  | Bem3  | Boi1  | Boi2  | Cdc24 | Cdc42 | Cla4  | Gic1  | Rga1  | Rgd2  | Ste20 |
|----------|-------|-------|-------|-------|-------|-------|-------|-------|-------|-------|-------|
| curve 1  | 4.32  | 21.34 | 21.89 | 25.22 | 13.31 | 10.44 | 13.94 | 16.82 | 30.11 | 11.74 | 9.00  |
| curve 2  | 19.08 | 23.08 | 27.13 | 29.81 | 8.08  | 17.75 | 10.67 | 26.11 | 18.99 | 21.20 | 30.83 |
| curve 3  | 9.22  | 14.04 | 22.01 | 8.86  | 24.80 | 19.91 | 14.92 | 27.74 | 33.10 | 15.70 | 19.61 |
| curve 4  | 5.62  | 21.38 | 15.34 | 14.94 | 15.17 | 14.71 | 17.89 | 17.85 | 26.19 | 14.02 | 10.92 |
| curve 5  | 15.74 | 10.24 | 26.41 | 6.68  | 17.40 | 7.86  | 18.36 | 15.05 | 42.90 | 16.68 | 15.32 |
| curve 6  | 15.92 | 16.52 | 30.35 | 9.25  | 24.11 | 12.61 | 8.91  | 19.70 | 17.07 | 23.06 | 22.48 |
| curve 7  | 8.75  | 27.77 | 23.75 | 7.98  | 14.44 | 21.92 | 21.34 | 21.87 | 41.14 | 18.08 | 14.44 |
| curve 8  | 14.13 | 14.23 | 28.84 | 19.28 | 11.57 | 8.98  | 20.56 | 20.16 | 28.59 | 18.29 | 14.28 |
| curve 9  | 8.37  | 18.94 | 18.61 | 11.83 | 14.31 | 10.49 | 30.60 | 36.56 | 39.15 | 21.59 | 18.40 |
| curve 10 | 4.58  | 22.52 | 21.61 | 31.31 | 20.60 | 10.86 | 25.32 | 20.20 | 15.45 | 12.17 | 23.20 |
| curve 11 | 5.98  |       | 27.85 |       | 10.49 |       | 12.57 |       | 30.32 | 9.93  |       |
| curve 12 |       |       |       |       | 16.48 |       |       |       |       |       |       |
| curve 13 |       |       |       |       | 28.24 |       |       |       |       |       |       |
| curve 14 |       |       |       |       | 10.72 |       |       |       |       |       |       |



**Table S5 .  $t_{1/2}$  values for proteins in Transport module**  
 (equation  $Y = A0 + A * \exp(-\omega * t)$  was used for iFRAP curve fitting,  
 for details see supplementary online material. )

|          | Bni1  | Bud6  | Lrg1  | Msb1  | Msb3  | Myo2  | Pea2   | Pkc1  | Pxl1  |
|----------|-------|-------|-------|-------|-------|-------|--------|-------|-------|
| curve 1  | 20.37 | 26.57 | 52.87 | 18.73 | 15.44 | 17.47 | 41.73  | 49.18 | 29.07 |
| curve 2  | 15.42 | 14.11 | 44.18 | 14.67 | 13.00 | 12.36 | 79.33  | 48.27 | 15.83 |
| curve 3  | 33.07 | 18.26 | 60.98 | 20.32 | 24.47 | 19.85 | 65.38  | 45.79 | 33.36 |
| curve 4  | 29.75 | 29.14 | 30.29 | 5.60  | 8.35  | 24.45 | 143.99 | 57.63 | 18.73 |
| curve 5  | 26.81 | 30.14 | 49.84 | 10.68 | 15.18 | 17.79 | 64.72  | 13.91 | 13.74 |
| curve 6  | 14.36 | 30.19 | 38.97 | 11.31 | 13.00 | 19.00 | 148.54 | 12.84 | 18.20 |
| curve 7  | 18.79 | 13.82 | 61.24 | 14.70 | 22.29 | 17.37 | 121.05 | 11.64 | 15.53 |
| curve 8  | 27.87 | 16.13 | 38.75 | 8.08  | 20.13 | 16.75 | 133.65 | 20.17 | 32.28 |
| curve 9  | 6.93  | 34.91 | 45.76 | 14.12 | 22.50 | 13.01 | 69.65  | 29.07 | 29.37 |
| curve 10 | 20.39 | 39.10 | 67.18 | 28.74 | 27.03 | 11.57 | 54.91  | 26.87 | 17.98 |
| curve 11 |       |       |       |       | 10.77 | 16.12 |        | 16.32 |       |
| curve 12 |       |       |       |       | 23.06 | 11.67 |        | 26.12 |       |
| curve 13 |       |       |       |       |       | 23.70 |        | 25.04 |       |
| curve 14 |       |       |       |       |       | 16.14 |        | 35.58 |       |
| curve 15 |       |       |       |       |       | 9.22  |        |       |       |

  

|          | Rgd1  | Rho1   | Rho3  | Smy1  | Spa2  | Yor304c-a | Mkk1  | Msb4  | Rom2  |
|----------|-------|--------|-------|-------|-------|-----------|-------|-------|-------|
| curve 1  | 33.70 | 91.15  | 26.37 | 12.01 | 25.04 | 18.36     | 23.30 | 14.15 | 16.22 |
| curve 2  | 26.45 | 101.67 | 24.18 | 14.41 | 19.42 | 28.85     | 18.00 | 45.78 | 32.52 |
| curve 3  | 33.06 | 101.73 | 12.83 | 12.94 | 28.76 | 28.20     | 22.96 | 38.90 | 16.85 |
| curve 4  | 21.89 | 123.08 | 6.99  | 17.43 | 31.85 | 18.12     | 35.25 | 20.00 | 17.18 |
| curve 5  | 26.32 | 56.96  | 11.24 | 20.87 | 28.99 | 16.27     | 18.99 | 16.01 | 38.54 |
| curve 6  | 38.75 | 52.51  | 4.89  | 34.66 | 30.25 | 33.70     | 13.26 | 16.83 | 26.03 |
| curve 7  | 15.95 | 95.08  | 23.43 | 14.03 | 42.95 | 27.23     | 31.61 | 16.39 | 21.71 |
| curve 8  | 10.98 | 45.28  | 24.11 | 24.83 | 31.61 | 39.75     | 28.09 | 25.79 | 13.32 |
| curve 9  | 14.62 | 46.51  | 10.17 | 23.26 | 22.18 | 48.74     | 26.28 | 16.68 | 28.83 |
| curve 10 | 20.14 | 39.87  | 10.09 | 28.25 | 39.58 | 38.13     | 17.54 | 42.71 | 17.94 |
| curve 11 |       | 72.65  |       |       |       |           |       |       |       |
| curve 12 |       | 57.36  |       |       |       |           |       |       |       |
| curve 13 |       | 94.75  |       |       |       |           |       |       |       |
| curve 14 |       | 94.65  |       |       |       |           |       |       |       |
| curve 15 |       | 60.81  |       |       |       |           |       |       |       |
| curve 16 |       | 58.28  |       |       |       |           |       |       |       |
| curve 17 |       | 67.88  |       |       |       |           |       |       |       |
| curve 18 |       | 41.14  |       |       |       |           |       |       |       |

**Table S6. There is no clear separation of  $t_{1/2}$  values between two modules**

| <b>module</b> | <b>protein</b> | <b>LSMean</b> | <b>Line2</b> | <b>Line1</b> |
|---------------|----------------|---------------|--------------|--------------|
| column A      | column B       | column C      | column D     | column E     |
| transport     | Pea2           | 92.2958       | A            |              |
| transport     | Rho1           | 72.2976       | B            |              |
| transport     | Lrg1           | 49.0053       | C            |              |
| transport     | Spa2           | 30.0618       | C            | D            |
| transport     | Pkc1           | 29.8887       | C            | D            |
| transport     | Yor304c-a      | 29.7346       | C            | D            |
| signaling     | Rga1           | 29.3638       | C            | D            |
| transport     | Msb4           | 25.3230       |              | D            |
| transport     | Bud6           | 25.2383       |              | D            |
| transport     | Rgd1           | 24.1865       |              | D            |
| signaling     | Boi1           | 23.9802       |              | D            |
| transport     | Mkk1           | 23.5280       |              | D            |
| transport     | Rom2           | 22.9140       |              | D            |
| transport     | Pxl1           | 22.4097       |              | D            |
| signaling     | Gic1           | 22.2062       |              | D            |
| transport     | Bni1           | 21.3748       |              | D            |
| transport     | Smy1           | 20.2712       |              | D            |
| signaling     | Bem3           | 19.0057       |              | D            |
| transport     | Msb3           | 17.9355       |              | D            |
| signaling     | Ste20          | 17.8486       |              | D            |
| signaling     | Cla4           | 17.7356       |              | D            |
| signaling     | Rgd2           | 16.5862       |              | D            |
| signaling     | Boi2           | 16.5163       |              | D            |
| transport     | Myo2           | 16.4315       |              | D            |
| signaling     | Cdc24          | 16.4087       |              | D            |
| transport     | Rho3           | 15.4310       |              | D            |
| transport     | Msb1           | 14.6941       |              | D            |
| signaling     | Cdc42          | 13.5537       |              | D            |
| signaling     | Bem1           | 10.1558       |              | D            |

LSMean: Least Square Mean

**Table S7. Global parameters for 29 proteins in Transport module and Signaling module**

|           | $t_{1/2}$ | degree | clustering coefficient | eccentricity | betweenness | Participation coefficient | z-score |
|-----------|-----------|--------|------------------------|--------------|-------------|---------------------------|---------|
| BEM1      | 10.16     | 14     | 0.27                   | 4            | 346.74      | 0.63                      | -0.26   |
| BEM3      | 19.00     | 4      | 0.17                   | 5            | 14.23       | 0.49                      | 2.03    |
| BNI1      | 21.38     | 12     | 0.18                   | 4            | 306.16      | 0.00                      | -0.28   |
| BOI1      | 23.98     | 4      | 1.00                   | 4            | 0.00        | 0.28                      | 0.01    |
| BOI2      | 16.52     | 6      | 0.60                   | 4            | 37.05       | 0.00                      | -0.26   |
| BUD6      | 25.20     | 10     | 0.29                   | 4            | 166.66      | 0.00                      | -0.87   |
| CDC24     | 16.41     | 13     | 0.33                   | 4            | 186.42      | 0.45                      | 2.95    |
| CDC42     | 13.55     | 21     | 0.17                   | 4            | 782.91      | 0.00                      | -1.5    |
| CLA4      | 17.74     | 12     | 0.21                   | 4            | 192.70      | 0.32                      | -0.64   |
| GIC1      | 22.21     | 3      | 1.00                   | 5            | 0.00        | 0.53                      | 0.01    |
| LRG1      | 49.00     | 3      | 0.00                   | 5            | 61.64       | 0.00                      | -0.12   |
| MKK1      | 23.53     | 3      | 0.00                   | 5            | 26.66       | 0.00                      | -0.87   |
| MSB1      | 14.69     | 2      | 0.00                   | 5            | 1.72        | 0.45                      | 0.74    |
| MSB3      | 17.90     | 7      | 0.33                   | 4            | 90.14       | 0.00                      | 0.97    |
| MSB4      | 25.32     | 7      | 0.33                   | 4            | 96.46       | 0.59                      | 0.74    |
| MYO2      | 16.43     | 9      | 0.14                   | 5            | 214.33      | 0.48                      | -0.93   |
| PEA2      | 92.30     | 6      | 0.40                   | 5            | 79.47       | 0.41                      | -0.07   |
| PKC1      | 29.90     | 4      | 0.00                   | 5            | 54.16       | 0.00                      | -0.98   |
| PXL1      | 22.40     | 1      | 0.00                   | 6            | 0.00        | 0.00                      | 0.01    |
| RGA1      | 29.36     | 8      | 0.14                   | 4            | 111.55      | 0.38                      | -0.12   |
| RGD1      | 24.19     | 4      | 0.00                   | 5            | 148.46      | 0.00                      | -0.55   |
| RGD2      | 16.59     | 2      | 0.00                   | 5            | 97.00       | 0.38                      | -0.12   |
| RHO1      | 72.30     | 10     | 0.04                   | 5            | 394.13      | 0.00                      | -0.98   |
| RHO3      | 15.43     | 4      | 0.00                   | 5            | 81.50       | 0.00                      | -0.55   |
| ROM2      | 22.91     | 2      | 0.00                   | 5            | 27.72       | 0.15                      | 1.34    |
| SMY1      | 20.27     | 1      | 0.00                   | 6            | 0.00        | 0.48                      | 1.6     |
| SPA2      | 30.06     | 10     | 0.20                   | 4            | 281.58      | 0.44                      | -1.56   |
| STE20     | 17.85     | 15     | 0.16                   | 4            | 439.29      | 0.63                      | 0       |
| YOR304C-A | 29.73     | 2      | 1.00                   | 5            | 0.00        | 0.50                      | -0.98   |
| average   | 26.08     | 6.86   | 0.24                   | 4.62         | 146.16      | 0.26                      | -0.04   |

**Correlation coefficient**

between  $t_{1/2}$  and

global parameters:

|              |             |             |              |              |              |
|--------------|-------------|-------------|--------------|--------------|--------------|
| <b>-0.10</b> | <b>0.02</b> | <b>0.21</b> | <b>-0.03</b> | <b>-0.11</b> | <b>-0.17</b> |
| A            | B           | C           | D            | E            | F            |

A: correlation between  $t_{1/2}$  and degree

B: correlation between  $t_{1/2}$  and clustering coefficient

C: correlation between  $t_{1/2}$  and eccentricity

D: correlation between  $t_{1/2}$  and betweenness

E: correlation between  $t_{1/2}$  and Participation Coefficient

F: correlation between  $t_{1/2}$  and Z-score

**Table S8. For most of the 29 proteins, there is no significant difference of the dynamics between interaction partners and non-interaction partners**

| protein name | direct_mean | indirect_mean | self_mean   | direct p value | indirect p value |
|--------------|-------------|---------------|-------------|----------------|------------------|
| Bem1         | 35.18579313 | 20.4200025    | 20.29053677 | 0.029284367    | 0.999453147      |
| Bem3         | 22.16449378 | 25.47004966   | 25.4260303  | 0.848077688    | 0.999957955      |
| Bni1         | 25.17449117 | 25.54996367   | 14.31911051 | 0.148577758    | 0.128636953      |
| Boi1         | 20.36943696 | 26.08663267   | 29.78392211 | 0.244261402    | 0.736717846      |
| Boi2         | 18.12387658 | 28.0709584    | 20.83555692 | 0.829057016    | 0.384624999      |
| Bud6         | 24.77557506 | 25.50010166   | 18.2009402  | 0.430359221    | 0.360273805      |
| Cdc24        | 21.68480089 | 26.86861351   | 21.43040874 | 0.998191532    | 0.534614185      |
| Cdc42        | 23.41198322 | 28.45603099   | 18.05252687 | 0.539930096    | 0.233742151      |
| Cla4         | 24.30578123 | 25.70635726   | 23.91960297 | 0.996351782    | 0.936990943      |
| Gic1         | 22.34634008 | 25.28820336   | 28.80837161 | 0.56330568     | 0.780396886      |
| Lrg1         | 49.57247335 | 22.27711449   | 42.89716174 | 0.449156949    | 0.001364365      |
| Mkk1         | 22.85327422 | 25.57026714   | 16.42044772 | 0.54070119     | 0.245110205      |
| Msb1         | 18.9455585  | 26.12290547   | 7.637098795 | 0.224553284    | 0.008691618      |
| Msb3         | 42.61289748 | 21.45390865   | 13.16625143 | 1.22873E-06    | 0.186960233      |
| Msb4         | 31.15164233 | 23.99075189   | 18.59142598 | 0.099604194    | 0.512872609      |
| Myo2         | 13.9622052  | 27.25109492   | 7.64310228  | 0.404214413    | 0.000541832      |
| Pea2         | 18.57977452 | 24.2033472    | 86.55516366 | 9.99978E-13    | 9.99978E-13      |
| Pkc1         | 50.12688838 | 23.21575298   | 25.13566874 | 0.000153343    | 0.881134011      |
| Pxl1         | 23.45519429 | 25.52291169   | 15.54061371 | 0.559010985    | 0.208813964      |
| Rga1         | 42.48827801 | 21.6535067    | 37.71609318 | 0.60168499     | 0.014368333      |
| Rgd1         | 8.042241793 | 25.85148207   | 16.79776579 | 0.490386237    | 0.264994085      |
| Rgd2         | 17.981655   | 25.83284746   | 23.03816779 | 0.678636315    | 0.833611673      |
| Rho1         | 23.62373005 | 23.01751404   | 67.63079073 | 9.99978E-13    | 9.99978E-13      |
| Rho3         | 11.46697195 | 27.05533248   | 6.838391381 | 0.652504284    | 0.003111965      |
| Rom2         | 67.44807956 | 23.31229875   | 18.06443312 | 9.99978E-13    | 0.506595814      |
| Smy1         | 8.717449835 | 26.17674736   | 12.5571785  | 0.818679808    | 0.061952758      |
| Spa2         | 23.06601882 | 25.77718193   | 22.74732693 | 0.996867955    | 0.780361927      |
| Ste20        | 21.35687704 | 26.7160152    | 23.29223319 | 0.90599407     | 0.758440988      |
| Yor304c-a    | 18.27848111 | 25.42256076   | 22.77475211 | 0.817038227    | 0.874000593      |

**Table S9 .  $t_{1/2}$  values for 2 proteins in Mitotic Exit module**  
(equation  $Y = A_0 + A * \exp(-\omega * t)$  was used for iFRAP curve fitting,  
for details see supplementary online material. )

|          | <b>Kel1</b> | <b>Lte1</b> |
|----------|-------------|-------------|
| curve 1  | 45.74       | 44.01       |
| curve 2  | 85.76       | 43.59       |
| curve 3  | 146.20      | 69.98       |
| curve 4  | 149.13      | 37.11       |
| curve 5  | 83.57       | 68.72       |
| curve 6  | 55.93       | 31.97       |
| curve 7  | 63.05       | 46.87       |
| curve 8  | 80.19       | 39.01       |
| curve 9  | 57.39       | 80.16       |
| curve 10 | 106.90      | 36.37       |

**Table S10.  $t_{1/2}$  values for 11 proteins in *pea2Δ***  
**(equation  $Y = A_0 + A * \exp(-\omega * t)$  was used for iFRAP curve fitting,**  
**for details see supplementary online material. )**

|          | $\Delta$ <i>pea2 Rga1-GFP</i> | $\Delta$ <i>pea2 GFP-Cdc42p</i> | $\Delta$ <i>pea2 Bni1-GFP</i> | $\Delta$ <i>pea2 Pkc1p-GFP</i> |
|----------|-------------------------------|---------------------------------|-------------------------------|--------------------------------|
| curve 1  | 12.78                         | 17.40                           | 14.29                         | 21.92                          |
| curve 2  | 32.83                         | 10.07                           | 13.39                         | 17.83                          |
| curve 3  | 42.38                         | 11.19                           | 16.83                         | 19.96                          |
| curve 4  | 11.95                         | 20.98                           | 12.53                         | 14.15                          |
| curve 5  | 14.33                         | 16.40                           | 27.54                         | 38.32                          |
| curve 6  | 37.17                         | 7.08                            | 20.19                         | 24.49                          |
| curve 7  | 18.70                         | 10.95                           | 30.32                         | 9.49                           |
| curve 8  | 24.15                         | 5.26                            | 16.49                         | 14.89                          |
| curve 9  | 34.15                         | 5.09                            | 10.25                         | 11.18                          |
| curve 10 | 35.92                         | 8.88                            | 10.43                         | 8.11                           |

|          | $\Delta$ <i>pea2 GFP-Rho3p</i> | $\Delta$ <i>pea2 Yor304c-a-GFP</i> | $\Delta$ <i>pea2 Bud6-GFP</i> | $\Delta$ <i>pea2 Myo2-GFP</i> |
|----------|--------------------------------|------------------------------------|-------------------------------|-------------------------------|
| curve 1  | 23.21                          | 12.66                              | 19.46                         | 17.92                         |
| curve 2  | 13.97                          | 11.39                              | 11.50                         | 19.63                         |
| curve 3  | 18.49                          | 14.03                              | 11.33                         | 11.46                         |
| curve 4  | 8.35                           | 10.56                              | 15.94                         | 15.78                         |
| curve 5  | 18.24                          | 14.04                              | 8.20                          | 27.21                         |
| curve 6  | 16.64                          | 16.83                              | 10.09                         | 31.55                         |
| curve 7  | 17.00                          | 17.47                              | 11.11                         | 46.32                         |
| curve 8  | 32.52                          | 31.40                              | 12.84                         | 8.28                          |
| curve 9  | 4.26                           | 4.49                               | 5.20                          | 23.42                         |
| curve 10 | 40.75                          | 4.82                               | 14.19                         | 19.64                         |

|          | $\Delta$ <i>pea2 Spa2-GFP</i> | $\Delta$ <i>pea2 Lrg1-GFP</i> | $\Delta$ <i>pea2 GFP-Rho1p</i> |
|----------|-------------------------------|-------------------------------|--------------------------------|
| curve 1  | 13.30                         | 41.16                         | 59.49                          |
| curve 2  | 10.45                         | 63.31                         | 26.08                          |
| curve 3  | 11.84                         | 24.51                         | 28.66                          |
| curve 4  | 25.05                         | 61.02                         | 43.68                          |
| curve 5  | 18.99                         | 75.17                         | 26.08                          |
| curve 6  | 22.79                         | 31.87                         | 38.04                          |
| curve 7  | 14.15                         | 45.78                         | 37.98                          |
| curve 8  | 16.80                         | 45.50                         | 28.94                          |
| curve 9  | 30.53                         | 56.13                         | 33.64                          |
| curve 10 | 30.66                         | 38.09                         | 33.24                          |
| curve 11 | 6.44                          | 48.35                         | 27.22                          |
| curve 12 |                               | 48.87                         | 22.83                          |
| curve 13 |                               | 40.39                         | 26.68                          |
| curve 14 |                               |                               | 13.94                          |
| curve 15 |                               |                               | 69.61                          |
| curve 16 |                               |                               | 58.15                          |
| curve 17 |                               |                               | 19.13                          |
| curve 18 |                               |                               | 33.39                          |

**Table S11. Yeast strains used in this study**

| Strain  | Mat | Relevant genotype (*)                                    | Source                           |
|---------|-----|----------------------------------------------------------|----------------------------------|
| RLY4555 | a   | <i>pea2Δ::KanR BNI1- GFP::HIS3</i>                       | from this paper                  |
| RLY4526 | a   | <i>pea2Δ::KanR BUD6- GFP::HIS3</i>                       | from this paper                  |
| RLY4528 | a   | <i>pea2Δ::KanR MYO2- GFP::HIS3</i>                       | from this paper                  |
| RLY4530 | a   | <i>pea2Δ::KanR SPA2- GFP::HIS3</i>                       | from this paper                  |
| RLY4553 | a   | <i>pea2Δ::KanR PKC1- GFP::HIS3</i>                       | from this paper                  |
| RLY4851 | a   | <i>pea2Δ::KanR YOR304C-A- GFP::URA3</i>                  | from this paper                  |
| RLY4852 | a   | <i>pea2Δ::KanR RGA1- GFP::URA3</i>                       | from this paper                  |
| RLY4853 | a   | <i>pea2Δ::KanR LRG1- GFP::URA3</i>                       | from this paper                  |
| RLY4531 | a   | <i>pea2Δ::KanR RHO1::GFP-RHO1-myc6::URA3</i>             | from this paper                  |
| RLY4533 | a   | <i>pea2Δ::KanR RHO3:: GFP-RHO3-myc6::URA3</i>            | from this paper                  |
| RLY4535 | a   | <i>pea2Δ::KanR CDC42:: GFP-CDC42-myc6::URA3</i>          | from this paper                  |
| RLY3479 | a   | <i>BNI1- GFP::HIS3</i>                                   | Huh <i>et al.</i> , Nature 2003. |
| RLY2912 | a   | <i>CLA4- GFP::HIS3</i>                                   | Huh <i>et al.</i> , Nature 2003. |
| RLY2550 | a   | <i>LRG1- GFP::HIS3</i>                                   | Huh <i>et al.</i> , Nature 2003. |
| RLY2908 | a   | <i>GIC1- GFP::HIS3</i>                                   | Huh <i>et al.</i> , Nature 2003. |
| RLY2907 | a   | <i>BOI2- GFP::HIS3</i>                                   | Huh <i>et al.</i> , Nature 2003. |
| RLY2766 | a   | <i>BEM1- GFP::HIS3</i>                                   | Huh <i>et al.</i> , Nature 2003. |
| RLY2913 | a   | <i>MSB4- GFP::HIS3</i>                                   | Huh <i>et al.</i> , Nature 2003. |
| RLY2910 | a   | <i>BOI1- GFP::HIS3</i>                                   | Huh <i>et al.</i> , Nature 2003. |
| RLY2544 | a   | <i>RGA1- GFP::HIS3</i>                                   | Huh <i>et al.</i> , Nature 2003. |
| RLY2556 | a   | <i>RGD2- GFP::HIS3</i>                                   | Huh <i>et al.</i> , Nature 2003. |
| RLY2557 | a   | <i>RGD1- GFP::HIS3</i>                                   | Huh <i>et al.</i> , Nature 2003. |
| RLY2558 | a   | <i>BUD6- GFP::HIS3</i>                                   | Huh <i>et al.</i> , Nature 2003. |
| RLY2769 | a   | <i>PKC1- GFP::HIS3</i>                                   | Huh <i>et al.</i> , Nature 2003. |
| RLY2916 | a   | <i>STE20- GFP::HIS3</i>                                  | Huh <i>et al.</i> , Nature 2003. |
| RLY2767 | a   | <i>CDC24- GFP::HIS3</i>                                  | Huh <i>et al.</i> , Nature 2003. |
| RLY2877 | a   | <i>MYO2- GFP::HIS3</i>                                   | Huh <i>et al.</i> , Nature 2003. |
| RLY2770 | a   | <i>MSB1- GFP::HIS3</i>                                   | Huh <i>et al.</i> , Nature 2003. |
| RLY3090 | a   | <i>BEM3- GFP::HIS3</i>                                   | Huh <i>et al.</i> , Nature 2003. |
| RLY3243 | a   | <i>SMY1- GFP::HIS3</i>                                   | Huh <i>et al.</i> , Nature 2003. |
| RLY3239 | a   | <i>PXL1- GFP::HIS3</i>                                   | Huh <i>et al.</i> , Nature 2003. |
| RLY3119 | a   | <i>SPA2- GFP::HIS3</i>                                   | Huh <i>et al.</i> , Nature 2003. |
| RLY4606 | a   | <i>PEA2- GFP::HIS3</i>                                   | Huh <i>et al.</i> , Nature 2003. |
| RLY4608 | a   | <i>MKK1- GFP::HIS3</i>                                   | Huh <i>et al.</i> , Nature 2003. |
| RLY4610 | a   | <i>ROM2- GFP::HIS3</i>                                   | Huh <i>et al.</i> , Nature 2003. |
| RLY4613 | a   | <i>YOR304C-A- GFP::HIS3</i>                              | Huh <i>et al.</i> , Nature 2003. |
| RLY4609 | a   | <i>MSB3- GFP::HIS3</i>                                   | Huh <i>et al.</i> , Nature 2003. |
| RLY3238 | a   | <i>BEM2- GFP::HIS3</i>                                   | Huh <i>et al.</i> , Nature 2003. |
| RLY2914 | a   | <i>LTE1- GFP::HIS3</i>                                   | Huh <i>et al.</i> , Nature 2003. |
| RLY2768 | a   | <i>KEL1- GFP::HIS3</i>                                   | Huh <i>et al.</i> , Nature 2003. |
| RLY3387 | a   | <i>RHO3::GFP-Rho3-myc6::URA3</i>                         | from this paper                  |
| RLY3385 | a   | <i>RHO1::GFP-Rho1-myc6::URA3</i>                         | from this paper                  |
| RLY2902 | a   | <i>CDC42::GFP-Cdc42-myc6::URA3</i>                       | from this paper                  |
| RLY4547 | a   | <i>SPA2- mCherryOPT::URA3 PEA2- GFP::HIS3</i>            | from this paper                  |
| RLY4548 | a   | <i>PEA2- mCherryOPT::HIS3 RHO1:: GFP-RHO1-myc6::URA3</i> | from this paper                  |

All strains are of S288C background and others with same type of genotype (markers)
